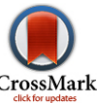

## Correction

# Correction: Feline Calicivirus Can Tolerate Gross Changes of Its Minor Capsid Protein Expression Levels Induced by Changing Translation Reinitiation Frequency or Use of a Separate VP2-Coding mRNA

The *PLOS ONE* Staff

### Notice of Republication

This article was republished on August 7, 2014, to replace incorrectly changed characters in the byline, citation, copyright statement, and Acknowledgments. The publisher apologizes for the errors. Please download this article again to view the correct version. The originally published, uncorrected article and the republished, corrected article are provided here for reference.

### Supporting Information

**File S1.** Originally published, uncorrected article.  
(PDF)

**File S2.** Republished, corrected article.  
(PDF)

### Reference

1. Haß M, Luttermann C, Meyers G (2014) Feline Calicivirus Can Tolerate Gross Changes of Its Minor Capsid Protein Expression Levels Induced by Changing Translation Reinitiation Frequency or Use of a Separate VP2-Coding mRNA. *PLoS ONE* 9(7): e102254. doi:10.1371/journal.pone.0102254

**Citation:** The *PLOS ONE* Staff (2014) Correction: Feline Calicivirus Can Tolerate Gross Changes of Its Minor Capsid Protein Expression Levels Induced by Changing Translation Reinitiation Frequency or Use of a Separate VP2-Coding mRNA. *PLoS ONE* 9(8): e107081. doi:10.1371/journal.pone.0107081

**Published:** August 25, 2014

**Copyright:** © 2014 The *PLOS ONE* Staff. This is an open-access article distributed under the terms of the Creative Commons Attribution License, which permits unrestricted use, distribution, and reproduction in any medium, provided the original author and source are credited.
